# Supplementary material for: How defensive medicine is defined and understood in European medical literature: protocol for a systematic review
Source: PubMed Central journal article supplement — BMJ Open. 2020 Feb 28;10(2):e034300. doi: 10.1136/bmjopen-2019-034300 (PMC7050374; doi:10.1136/bmjopen-2019-034300), 2020-02-28
Supplement: bmjopen-2019-034300.draft_revisions.pdf [file bmjopen-2019-034300.draft_revisions.pdf]

# BMJ Open

BMJ Open is committed to open peer review. As part of this commitment we make the peer review history of every article we publish publicly available.

When an article is published we post the peer reviewers' comments and the authors' responses online. We also post the versions of the paper that were used during peer review. These are the versions that the peer review comments apply to.

The versions of the paper that follow are the versions that were submitted during the peer review process. They are not the versions of record or the final published versions. They should not be cited or distributed as the published version of this manuscript.

BMJ Open is an open access journal and the full, final, typeset and author-corrected version of record of the manuscript is available on our site with no access controls, subscription charges or pay-per-view fees (<http://bmjopen.bmj.com>).

If you have any questions on BMJ Open's open peer review process please email [info.bmjopen@bmj.com](mailto:info.bmjopen@bmj.com)

# BMJ Open

## How defensive medicine is defined and understood in European medical literature: Protocol for a systematic review

|                               |                                                                                                                                                                                                                                                                                                                                                                                                                                                                                                                                                                                                                                                                                                                                                                                                                                                                                                                                                                                                                                                                                                |
|-------------------------------|------------------------------------------------------------------------------------------------------------------------------------------------------------------------------------------------------------------------------------------------------------------------------------------------------------------------------------------------------------------------------------------------------------------------------------------------------------------------------------------------------------------------------------------------------------------------------------------------------------------------------------------------------------------------------------------------------------------------------------------------------------------------------------------------------------------------------------------------------------------------------------------------------------------------------------------------------------------------------------------------------------------------------------------------------------------------------------------------|
| Journal:                      | <i>BMJ Open</i>                                                                                                                                                                                                                                                                                                                                                                                                                                                                                                                                                                                                                                                                                                                                                                                                                                                                                                                                                                                                                                                                                |
| Manuscript ID                 | bmjopen-2019-034300                                                                                                                                                                                                                                                                                                                                                                                                                                                                                                                                                                                                                                                                                                                                                                                                                                                                                                                                                                                                                                                                            |
| Article Type:                 | Protocol                                                                                                                                                                                                                                                                                                                                                                                                                                                                                                                                                                                                                                                                                                                                                                                                                                                                                                                                                                                                                                                                                       |
| Date Submitted by the Author: | 02-Oct-2019                                                                                                                                                                                                                                                                                                                                                                                                                                                                                                                                                                                                                                                                                                                                                                                                                                                                                                                                                                                                                                                                                    |
| Complete List of Authors:     | <p>Baungaard Pedersen, Nathalie; University of Southern Denmark Faculty of Health Sciences, Department of Public Health, Research Unit of General Practice.</p> <p>Skovvang Juul Jespersen, Pia; University of Southern Denmark Faculty of Health Sciences, Department of Public Health, Research Unit of General Practice.</p> <p>Assing Hvidt, Elisabeth; University of Southern Denmark Faculty of Health Sciences, Department of Public Health, Research Unit of General Practice.; University of Southern Denmark, Department for the Study of Culture</p> <p>Gerbild, Helle; Aalborg Universitet, Center for Sexology Research, Department of Clinical Medicine; University College Lillebaelt - Campus Odense, Health Sciences Research Centre University College</p> <p>Kirstine Andersen, Merethe; University of Southern Denmark Faculty of Health Sciences, Department of Public Health, Research Unit of General Practice</p> <p>Lykkegaard, Jesper; University of Southern Denmark Faculty of Health Sciences, Department of Public Health, Research Unit of General Practice</p> |
| Keywords:                     | Defensive medicine, Systematic review, Definition                                                                                                                                                                                                                                                                                                                                                                                                                                                                                                                                                                                                                                                                                                                                                                                                                                                                                                                                                                                                                                              |
|                               |                                                                                                                                                                                                                                                                                                                                                                                                                                                                                                                                                                                                                                                                                                                                                                                                                                                                                                                                                                                                                                                                                                |

SCHOLARONE™  
Manuscripts

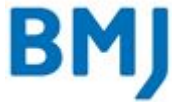

I, the Submitting Author has the right to grant and does grant on behalf of all authors of the Work (as defined in the below author licence), an exclusive licence and/or a non-exclusive licence for contributions from authors who are: i) UK Crown employees; ii) where BMJ has agreed a CC-BY licence shall apply, and/or iii) in accordance with the terms applicable for US Federal Government officers or employees acting as part of their official duties; on a worldwide, perpetual, irrevocable, royalty-free basis to BMJ Publishing Group Ltd ("BMJ") its licensees and where the relevant Journal is co-owned by BMJ to the co-owners of the Journal, to publish the Work in this journal and any other BMJ products and to exploit all rights, as set out in our [licence](#).

The Submitting Author accepts and understands that any supply made under these terms is made by BMJ to the Submitting Author unless you are acting as an employee on behalf of your employer or a postgraduate student of an affiliated institution which is paying any applicable article publishing charge ("APC") for Open Access articles. Where the Submitting Author wishes to make the Work available on an Open Access basis (and intends to pay the relevant APC), the terms of reuse of such Open Access shall be governed by a Creative Commons licence – details of these licences and which [Creative Commons](#) licence will apply to this Work are set out in our licence referred to above.

Other than as permitted in any relevant BMJ Author's Self Archiving Policies, I confirm this Work has not been accepted for publication elsewhere, is not being considered for publication elsewhere and does not duplicate material already published. I confirm all authors consent to publication of this Work and authorise the granting of this licence.

September 2019

1  
2  
3  
4  
5  
6  
7  
8  
9 Protocol for Systematic Review  
10  
11  
12  
13  
14

15 How defensive medicine is defined and understood in  
16 European medical literature: Protocol for a systematic  
17  
18 review  
19  
20  
21  
22  
23  
24  
25  
26  
27  
28  
29  
30  
31  
32  
33  
34  
35  
36  
37  
38  
39  
40  
41  
42  
43  
44  
45  
46  
47  
48  
49  
50  
51  
52  
53  
54  
55  
56  
57  
58  
59  
60

Authors:

Nathalie Baungaard Pedersen, NBP

Pia Skovvang Juul Jespersen, PSJJ

Elisabeth Assing Hvidt, EAH

Helle Gerbild, HG

Merethe Kirstine Andersen, MKA

Jesper Lykkegaard, JL

**Word count:** 2405

1 September 2019  
2  
3

4 ADMINISTRATIVE INFORMATION  
5  
6  
7

8  
9 **Title:**

10  
11 How defensive medicine is defined and understood in European medical literature: Protocol for a  
12  
13 systematic review.  
14  
15

16  
17  
18 **Registration:**

19  
20 This review will be registered in PROSPERO, International prospective register of systematic  
21  
22 reviews (1).  
23  
24  
25

26  
27 **Authors:**

28  
29 Nathalie Baungaard Pedersen<sup>a</sup>, Pia Skovvang Juul Jespersen<sup>a</sup>, Elisabeth Assing Hvidt<sup>ab</sup>, Helle  
30  
31 Gerbild<sup>cd</sup>, Merethe Kirstine Andersen<sup>a</sup>, Jesper Lykkegaard<sup>a</sup>.  
32  
33

34  
35  
36 <sup>a</sup> Research Unit of General Practice, Department of Public Health, University of Southern Denmark,  
37  
38 5000 Odense C, Denmark.  
39

40  
41 <sup>b</sup> Department for the Study of Culture, University of Southern Denmark, 5230 Odense M, Denmark  
42

43  
44 <sup>c</sup> Center for Sexology Research, Department of Clinical Medicine, Aalborg University, Aalborg,  
45  
46 Denmark.  
47

48  
49 <sup>d</sup> Health Sciences Research Centre University College, Odense, Denmark.  
50  
51

52  
53 E-mail: nathaliebaungaard@gmail.com, piasjj@hotmail.com, ehvidt@health.sdu.dk, heng@ucl.dk,  
54  
55 mkandersen@health.sdu.dk, jlykkegaard@health.sdu.dk  
56  
57  
58  
59  
60

September 2019

\*Corresponding author: Nathalie Baungaard Pedersen, Research Unit of General Practice, Department of Public Health, University of Southern Denmark, J. B. Winsløws Vej 9A, 5000 Odense C, Denmark, Ph.: +45 28 30 72 95; e-mail: nathaliebaungaard@gmail.com

### Authors' contributions

|      |                                                                                                                                                                                                     |
|------|-----------------------------------------------------------------------------------------------------------------------------------------------------------------------------------------------------|
| NBP  | Conceptualisation, protocol design, development of search strategy, study inclusion, data extraction, quality assessment, data analysis/synthesis, drafting and writing of protocol and manuscript. |
| PSJJ | Conceptualisation, development of search strategy, study inclusion, data extraction, quality assessment, data analysis/synthesis, drafting and writing of manuscript.                               |
| EAH  | Conceptualisation, protocol design, writing of protocol and manuscript.                                                                                                                             |
| HG   | Conceptualisation, protocol design, writing of manuscript.                                                                                                                                          |
| MKA  | Conceptualisation, protocol design, writing of manuscript.                                                                                                                                          |
| JL   | Conceptualisation, protocol design, study inclusion, writing of protocol and manuscript.                                                                                                            |

### Financial support

This research receives no specific grant from any funding agency in the public, commercial or not-for-profit sectors. All authors were financed through their institutions. The funders had no role in developing the protocol.

### ABSTRACT

1  
2  
3  
4  
5  
6  
7  
8  
9  
10  
11  
12  
13  
14  
15  
16  
17  
18  
19  
20  
21  
22  
23  
24  
25  
26  
27  
28  
29  
30  
31  
32  
33  
34  
35  
36  
37  
38  
39  
40  
41  
42  
43  
44  
45  
46  
47  
48  
49  
50  
51  
52  
53  
54  
55  
56  
57  
58  
59  
60

September 2019

**Introduction:** The term defensive medicine originates from the United States and is used in medical research literature since the late 1960s. Differences in medical legal systems between the US and most European countries raise the question whether the US definition of defensive medicine, as actions motivated primarily by litigious concerns, holds true in Europe where in most countries there is no tort legislation.

**Aim:** To present the protocol of a systematic review of variations in the definition and understandings of the term “defensive medicine” in European research articles.

**Methods and Analysis:** In accordance with the PRISMA guidelines, a systematic review of all medical research literature that investigates defensive medicine will be performed by two independent reviewers. The databases PubMed, Embase and Cochrane will be systematically searched on the basis of predetermined criteria. Data from all included European studies will systematically be extracted including the studies’ definitions and understandings of defensive medicine, especially the types of motives for medical actions that each study regards as defensive.

**Ethics and Dissemination:** No ethics clearance is required as no primary data will be collected. The results of the systematic review will be published in a peer-review journal.

### **Strengths and limitations of this study**

- The systematic review will be based on a systematic and thorough search of literature independently performed by two reviewers following the PRISMA guidelines hereby increasing the generalisability and reliability of the findings.
- The review will identify variations in the definitions of defensive medicine employed in the European research literature and analyse essential elements herein.
- Only publications of original research studies are reviewed.

1  
2  
3  
4  
5  
6  
7  
8  
9  
10  
11  
12  
13  
14  
15  
16  
17  
18  
19  
20  
21  
22  
23  
24  
25  
26  
27  
28  
29  
30  
31  
32  
33  
34  
35  
36  
37  
38  
39  
40  
41  
42  
43  
44  
45  
46  
47  
48  
49  
50  
51  
52  
53  
54  
55  
56  
57  
58  
59  
60

September 2019

## INTRODUCTION

### **Background**

Defensive medicine (DM) is a term used in the medical research literature since the late 1960s (2). The term originates from the US (3) and has since then taken on various connotations (4). The most commonly used definition describes DM as physicians' deviations from sound medical practice due to fear of liability claims and lawsuits (5-9). DM can additionally be subdivided into two main forms of behaviour: 1. positive DM (also named either active DM or assurance behaviour), which involves physicians ordering extra diagnostic tests, procedures or visits and 2. negative DM (also named passive DM or avoidance behaviour) which is the avoidance of high-risk patients or procedures. Both forms aim to reduce physicians' exposure to malpractice liability (5-8). The above definition of DM consists of two components: A medical action and an underlying motive for acting defensively.

DM has been associated with rising health care costs (8). Furthermore, it has been associated with overtreatment, -prescription and -diagnosing of patients and decreased trust in the physician-patient relationship, leading physicians to regard patients as potential plaintiffs (8, 10-13). Moreover, physicians report patient disrespect for their professionalism, personal frustration among physicians, and inequality in healthcare as possible consequences of defensive medicine (14, 15).

In the US, DM is reported to be frequent (16). The number of lawsuits for medical malpractice has risen significantly in the US (10), and DM has been shown to be directly related to this growth (13). US physicians are forced to hold expensive malpractice insurances in order to cover the cost from malpractice suits (17). Hence, with inadequate legislation protecting physicians from tort, concerns about malpractice liability is likely to be the predominant reason to act defensively (8). Indeed, negative associations have been found between physicians' use of medical resources and risk of malpractice claims (18).



1 September 2019  
2  
3

4 In several European countries malpractice litigation is reported to happen less frequently than in  
5 the US, e.g. in The Netherlands (3, 19) Denmark (14), Switzerland (20), and the UK (21).  
6  
7 Furthermore, in some European countries, the medico-legal system protects the physicians who are  
8  
9 not held financially liable for malpractice or other treatment related adverse events. In addition, the  
10  
11 patients are instead compensated by the government (known as a no-fault system) (22-24).  
12  
13 Nevertheless, DM seems also to be prevalent in Europe, e.g. Denmark (14), the UK (25), Italy (13),  
14  
15 Belgium (26), The Netherlands (3), Germany (27) and Switzerland (21), and a substantial part of  
16  
17 research on DM seems to originate from Europe.  
18  
19  
20  
21

22  
23 Variations in medico-legal systems between the US and most European countries raise the question  
24  
25 whether the definition of DM, as actions motivated primarily by litigious concerns, holds true in  
26  
27 European countries where physicians are not subjected to tort legislation (21) and if other motives for  
28  
29 performing defensive medical actions are documented in the European literature on DM (28).  
30  
31  
32

### 33 **Rationale**

34  
35 To our knowledge no systematic review exists of how DM is defined and understood in the European  
36  
37 medical literature. A systematic review of the term “defensive medicine” in the European context  
38  
39 will provide a more nuanced understanding of this complex and non-beneficial phenomenon, hereby  
40  
41 increasing the possibilities to reduce the practice of DM in future health care.  
42  
43  
44  
45

### 46 **Objectives**

47  
48 The aim of this study is to present a protocol paper for a systematic review with the following  
49  
50 objective: To analyse variations in the definition and understandings of the term “defensive medicine”  
51  
52 in European research articles.  
53  
54  
55

### 56 METHODS

57  
58  
59  
60

1  
2  
3  
4  
5  
6  
7  
8  
9  
10  
11  
12  
13  
14  
15  
16  
17  
18  
19  
20  
21  
22  
23  
24  
25  
26  
27  
28  
29  
30  
31  
32  
33  
34  
35  
36  
37  
38  
39  
40  
41  
42  
43  
44  
45  
46  
47  
48  
49  
50  
51  
52  
53  
54  
55  
56  
57  
58  
59  
60

September 2019

## **Patient and Public Involvement**

Patients or the public were not involved in the design, or conduct, or reporting, or dissemination of our research.

## **Protocol**

This protocol for a systematic review is conducted in accordance with the PRISMA-P (Preferred Reporting Items for Systematic Reviews – Protocol) (29).

## **Eligibility criteria**

Publications will be included in the review based on the following criteria:

### *Inclusion criteria:*

1. The terms “defensive medicine” or “defensive practice” are stated in title or abstract.
2. The study is available in full-text and written in English language.
3. DM is performed by physicians.
4. The study is an original research study or systematic review published in a medical journal.
5. DM is stated as part of the study’s aim/objective in at least one of the following ways:
  - a. DM is included in the publication’s aim/objective.
  - b. DM is implicitly a significant part of the aim/objective.

### Further

6. The study’s research data includes data from Europe.

## **Information sources**

Eligible studies will be searched in three databases: PubMed, Embase and Cochrane.

1 September 2019  
2  
3  
4  
5  
6

## 7 **Search strategy**

8  
9 The preparation of search strategy is based on the term “defensive medicine”. In accordance with the  
10 database PubMed, the MeSH term “defensive medicine” is combined with the entry terms “defensive  
11 practice”, “defensive practices” and “medicine, defensive”. On the basis of this, the following search  
12 strategy will be used: “defensive medicine OR defensive practice OR defensive practices OR  
13 medicine, defensive”, see appendix. All references in the papers fulfilling the inclusion criteria will  
14 be examined in order to identify potentially neglected studies. The literature search will be updated  
15 before the final analysis. See appendix for detailed search strategy.  
16  
17  
18  
19  
20  
21  
22  
23  
24  
25  
26

## 27 **Study records**

### 28 *Data management*

29  
30 Publications found by the search strategy will be exported into the reference management software  
31 (EndNote) (30) and the software Covidence (31), where the systematic screening and data extraction  
32 will be performed, including the removing of duplicates. Number of citations for each study will be  
33 assessed with Web of Science (32) in accordance with the PRISMA guidelines (29).  
34  
35  
36  
37  
38  
39  
40  
41  
42  
43

### 44 *Selection process*

45  
46 Two independent reviewers (NBP and PSJJ) will screen all potentially relevant studies in a two-phase  
47 screening process to ensure compliance with the inclusion criteria and eligibility by use of Covidence  
48 (31). NBA and PSJJ will discuss and resolve any disagreements to reach consensus. If consensus is  
49 not achievable, a third reviewer (JL) will be involved in the discussion and finally decide whether the  
50 study in question is to be included or not.  
51  
52  
53  
54  
55  
56  
57  
58  
59  
60

1  
2  
3  
4  
5  
6  
7  
8  
9  
10  
11  
12  
13  
14  
15  
16  
17  
18  
19  
20  
21  
22  
23  
24  
25  
26  
27  
28  
29  
30  
31  
32  
33  
34  
35  
36  
37  
38  
39  
40  
41  
42  
43  
44  
45  
46  
47  
48  
49  
50  
51  
52  
53  
54  
55  
56  
57  
58  
59  
60

September 2019

### *Data collection process*

The primary authors (NBP and PSJJ) will extract data from the included studies, including publication details (author(s), name of journal, year of publication), study characteristics (design, country of origin, sample size, medical speciality investigated, and number of citations), study objective, stated definition of DM and understandings of DM.

### **Quality assessment**

The two reviewers (NBP and PSJJ) will independently assess the quality of each study. The qualitative studies will be reviewed using the Critical Appraisal Skills Programme (CASP) (33), recommended by the Centre for Clinical Guidelines (CFKR) (34), to ensure a critical and standardized assessment of the quality and analysis of the study. The quantitative studies will be reviewed using a cross-sectional appraisal tool with questions adapted from Guyatt GH et al. JAMA 1993 and 1994 (35, 36). The systematic reviews and meta-analysis will be reviewed using Assessing the Methodological Quality of Systematic Reviews (AMSTAR) (37) recommended by the Centre for Clinical Guidelines (CFKR) (34). Disagreements will be discussed until consensus is reached.

### **Data items**

Data items are as stated above under “methods”. The design of the review is based on the hypothesis that a definition of DM reflects the medico-legal context in which it is used. Therefore, we expect the definitions stated and understandings of DM in the European research literature to be different than those stated in the literature deriving from the US.

### **Data synthesis**

1  
2  
3  
4  
5  
6  
7  
8  
9  
10  
11  
12  
13  
14  
15  
16  
17  
18  
19  
20  
21  
22  
23  
24  
25  
26  
27  
28  
29  
30  
31  
32  
33  
34  
35  
36  
37  
38  
39  
40  
41  
42  
43  
44  
45  
46  
47  
48  
49  
50  
51  
52  
53  
54  
55  
56  
57  
58  
59  
60

September 2019

For each paper, the stated definition and understanding of DM will be extracted by the first author (NBP). The definition of DM will be identified as: “DM is...”, “DM is defined as...”, “DM refers to...”, or “DM is characterized by...”. If no definition of DM is stated, the way in which DM is introduced will be identified. A paper’s understanding of DM is assessed from its use in the study and may differ from the stated definition. Quotes identifying how DM is understood will be extracted and analysed according to a thematic analysis approach aiming to categorize the findings. Based on the above definitions of DM, it is expected that the vast majority of papers will define DM as healthcare actions conducted by healthcare professionals during their work, but that the motives making the actions defensive may differ between papers showing a broader understanding of DM in some European studies than according to the US definition. Thus, for each paper, the motives regarded as defensive will be identified in the texts, tables, figures, as well as in the data collection methods. The identified categories of DM definitions and understandings will be scrutinized by the author group.

### **Outcomes and prioritization**

The review’s main outcomes will be a categorisation of the identified definitions of DM in the European medical research literature focusing on the motives for medical acting that the studies regard as defensive and a graphical display of the historical trend in the annual number of published European original research papers regarding DM divided on the identified categories of DM definitions.

### **Risk of bias in individual studies**

Since the objective of this study differs from most reviews by not taking interest in the results found by the reviewed studies, the quality assessment of the identified papers serves a different purpose.

1  
2  
3  
4  
5  
6  
7  
8  
9  
10  
11  
12  
13  
14  
15  
16  
17  
18  
19  
20  
21  
22  
23  
24  
25  
26  
27  
28  
29  
30  
31  
32  
33  
34  
35  
36  
37  
38  
39  
40  
41  
42  
43  
44  
45  
46  
47  
48  
49  
50  
51  
52  
53  
54  
55  
56  
57  
58  
59  
60

September 2019

The quality of the papers is used to show whether high quality papers use a different definition of DM than other papers. See the above described quality assessment procedure.

### **Conclusion**

This systematic review will address the variations in the definition and understandings of the term “defensive medicine” in European research articles. This review will provide a more nuanced understanding of this complex and non-beneficial phenomenon, hereby increasing the possibilities to reduce the practice of DM in future health care.

### **Potential amendments**

We do not envisage any amendments to the present protocol. However, should an amendment be necessary, it will be notified, registered and reported.

### **Funding**

This study has not received any funding.

### **Exclusive licence**

I (NBP), the Submitting Author has the right to grant and does grant on behalf of all authors of the Work (as defined in the below author licence), an exclusive licence and/or a non-exclusive licence for contributions from authors who are: i) UK Crown employees; ii) where BMJ has agreed a CC-BY licence shall apply, and/or iii) in accordance with the terms applicable for US Federal Government officers or employees acting as part of their official duties; on a worldwide, perpetual, irrevocable, royalty-free basis to BMJ Publishing Group Ltd (“BMJ”) its licensees and where the

1 September 2019  
2  
3

4 relevant Journal is co-owned by BMJ to the co-owners of the Journal, to publish the Work in BMJ  
5  
6 Open and any other BMJ products and to exploit all rights, as set out in our licence.  
7  
8  
9

10  
11 The Submitting Author accepts and understands that any supply made under these terms is made by  
12  
13 BMJ to the Submitting Author unless you are acting as an employee on behalf of your employer or a  
14  
15 postgraduate student of an affiliated institution which is paying any applicable article publishing  
16  
17 charge (“APC”) for Open Access articles. Where the Submitting Author wishes to make the Work  
18  
19 available on an Open Access basis (and intends to pay the relevant APC), the terms of reuse of such  
20  
21 Open Access shall be governed by a Creative Commons licence – details of these licences and which  
22  
23 Creative Commons licence will apply to this Work are set out in our licence referred to above.  
24  
25  
26  
27

## 28 **Acknowledgements** 29

30  
31 Research librarian, Lasse Østengaard, University of Southern Denmark for advice on the search strategy.  
32  
33

## 34 **Conflict of interests** 35

36  
37  
38 The authors declare that they have no competing interests.  
39  
40  
41  
42  
43  
44  
45  
46  
47  
48  
49  
50  
51  
52  
53  
54  
55  
56  
57  
58  
59  
60

September 2019

## References

1. PROSPERO. (Online) Available at: <https://www.crd.york.ac.uk/prospero/>. Accessed July 2019
2. Guthorn PJ. Toward a defensive stance in medical practice. *The Journal of the Medical Society of New Jersey*. 1968;65(10):548-9.
3. Veldhuis M. Defensive behavior of Dutch family physicians. Widening the concept. *Family medicine*. 1994;26(1):27-9.
4. Jones WA, Johnson JA, Williams SP. Controlling defensive medical practices and costs through state health policy reform. *Journal of health and human services administration*. 1996;19(2):163-81.
5. Studdert DM, Mello MM, Sage WM, DesRoches CM, Peugh J, Zapert K, et al. Defensive medicine among high-risk specialist physicians in a volatile malpractice environment. *Jama*. 2005;293(21):2609-17.
6. Corrigan J, Wagner J, Wolfe L, Klingman D, Polishuk P. Medical malpractice reform and defensive medicine. *Cancer investigation*. 1996;14(3):277-84.
7. OTA. Office of Technology Assessment. Defensive medicine and medical malpractice. Washington (DC). (Online) Available from: <http://ota.fas.org/reports/9405.pdf>. 1994 (Publication No. OTA-H-602). Accessed July 2019.
8. Panella M, Rinaldi C, Leigheb F, Knesse S, Donnarumma C, Kul S, et al. Prevalence and costs of defensive medicine: A national survey of Italian physicians. *Journal of Health Services Research and Policy*. 2017;22(4):211-7.
9. Hershey N. The defensive practice of medicine. Myth or reality. *The Milbank Memorial Fund quarterly*. 1972;50(1):69-98.
10. Garcia-Retamero R, Galesic M. On defensive decision making: how doctors make decisions for their patients. *Health expectations : an international journal of public participation in health care and health policy*. 2014;17(5):664-9.
11. Brateanu A, Schramm S, Hu B, Boyer K, Nottingham K, Taksler GB, et al. Quantifying the defensive medicine contribution to primary care costs. *Journal of medical economics*. 2014;17(11):810-6.
12. Bourne T, Wynants L, Peters M, Van Audenhove C, Timmerman D, Van Calster B, et al. The impact of complaints procedures on the welfare, health and clinical practise of 7926 doctors in the UK: a cross-sectional survey. *BMJ open*. 2015;5(1):e006687.
13. Catino M, Celotti S. The problem of defensive medicine: two Italian surveys. *Studies in health technology and informatics*. 2009;148:206-21.
14. Assing Hvidt E, Lykkegaard J, Pedersen LB, Pedersen KM, Munck A, Andersen MK. How is defensive medicine understood and experienced in a primary care setting? A qualitative focus group study among Danish general practitioners. *BMJ open*. 2017;7(12):e019851.
15. Assing Hvidt E, Bjornskov Pedersen L, Lykkegaard J, Moller Pedersen K, Andersen MK. A colonized general practice? A critical habermasian analysis of how general practitioners experience defensive medicine in their everyday working life. *Health (London)*. 2019:1363459319857461.
16. Hooe BS, Thakore RV, Issar N, Sathiyakumar V, Obremeskey WT, Sethi MK. Do practice settings influence defensive medicine in orthopedic surgery? *American journal of orthopedics (Belle Mead, NJ)*. 2014;43(8):E175-80.



September 2019

- 1
- 2
- 3
- 4
- 5 17. Investopedia. (Online) Available at:
- 6 <https://www.investopedia.com/terms/m/malpractice-insurance.asp>. Accessed 6th August 2018.
- 7 18. Jena AB, Schoemaker L, Bhattacharya J, Seabury SA. Physician spending and
- 8 subsequent risk of malpractice claims: observational study. *BMJ (Clinical research ed)*.
- 9 2015;351:h5516.
- 10 19. Van Boven K, Dijksterhuis P, Lamberts H. Defensive testing in Dutch family practice. Is
- 11 the grass greener on the other side of the ocean? *The Journal of family practice*. 1997;44(5):468-
- 12 72.
- 13 20. Rohacek M, Buatsi J, Szucs-Farkas Z, Kleim B, Zimmermann H, Exadaktylos A, et al.
- 14 Ordering CT pulmonary angiography to exclude pulmonary embolism: defense versus evidence in
- 15 the emergency room. *Intensive care medicine*. 2012;38(8):1345-51.
- 16 21. Steurer J, Held U, Schmidt M, Gigerenzer G, Tag B, Bachmann LM. Legal concerns
- 17 trigger prostate-specific antigen testing. *Journal of evaluation in clinical practice*. 2009;15(2):390-
- 18 2.
- 19 22. Antoci A, Fiori Maccioni A, Russu P. The Ecology of Defensive Medicine and
- 20 Malpractice Litigation. *PloS one*. 2016;11(3):e0150523.
- 21 23. Yan SC, Hulsbergen AFC, Muskens IS, van Dam M, Gormley WB, Broekman MLD, et al.
- 22 Defensive medicine among neurosurgeons in the Netherlands: a national survey. *Acta*
- 23 *neurochirurgica*. 2017;159(12):2341-50.
- 24 24. Kessler DP, Summerton N, Graham JR. Effects of the medical liability system in
- 25 Australia, the UK, and the USA. *Lancet (London, England)*. 2006;368(9531):240-6.
- 26 25. Summerton N. Trends in negative defensive medicine within general practice. *The*
- 27 *British journal of general practice : the journal of the Royal College of General Practitioners*.
- 28 2000;50(456):565-6.
- 29 26. Vandersteegen T, Marneffe W, Cleemput I, Vandijck D, Vereeck L. The determinants
- 30 of defensive medicine practices in Belgium. *Health economics, policy, and law*. 2017;12(3):363-86.
- 31 27. Brilla R, Evers S, Deutschlander A, Wartenberg KE. Are neurology residents in the
- 32 United States being taught defensive medicine? *Clinical neurology and neurosurgery*.
- 33 2006;108(4):374-7.
- 34 28. Ramella S, Mandoliti G, Trodella L, D'Angelillo RM. The first survey on defensive
- 35 medicine in radiation oncology. *La Radiologia medica*. 2015;120(5):421-9.
- 36 29. Shamseer L MD, Clarke M, Ghera D, Liberati A, Petticrew M, Shekelle P, Stewart LA;
- 37 PRISMA-P Group. Preferred reporting items for systematic review and meta-analysis protocols
- 38 (PRISMA-P) 2015: elaboration and explanation. *BMJ (Clinical research ed)*. 2015;350:g7647.
- 39 30. EndNote. (Online) Available at: <https://endnote.com>. Accessed July 2019.
- 40 31. Covidence. (Online) Available at: <https://www.covidence.org/reviews>. Accessed July
- 41 2019.
- 42 32. WebOfScience. (Online) Available at [www.webofknowledge.com/](http://www.webofknowledge.com/).
- 43 33. CASP. Critical Appraisal Skills Programme (2018). CASP (Qualitative) Checklist.
- 44 (Online) Available at: [https://casp-uk.net/wp-content/uploads/2018/01/CASP-Qualitative-](https://casp-uk.net/wp-content/uploads/2018/01/CASP-Qualitative-Checklist-2018.pdf)
- 45 [Checklist-2018.pdf](https://casp-uk.net/wp-content/uploads/2018/01/CASP-Qualitative-Checklist-2018.pdf). Accessed July 2019.
- 46 34. CFKR. Center for kliniske retningslinjer. CASP tool. (Online) Available at:
- 47 <http://www.cfkr.dk/manualer-og-skabeloner/casp-instrumentet.aspx>. Accessed July 2019.
- 48
- 49
- 50
- 51
- 52
- 53
- 54
- 55
- 56
- 57
- 58
- 59
- 60

September 2019

- 1  
2  
3  
4 35. Guyatt GH SD, Cook DJ. Users' guides to the medical literature. II. How to use an  
5 article about therapy or prevention. A. Are the results of the study valid? Evidence-Based  
6 Medicine Working Group. *Jama*. 1993;270(21):2598-601.  
7  
8 36. Guyatt GH SD, Cook DJ. Users' guides to the medical literature. II. How to use an  
9 article about therapy or prevention. B. What were the results and will they help me in caring for  
10 my patients? Evidence-Based Medicine Working Group. *Jama*. 1994;271(1):59-63.  
11  
12 37. AMSTAR. Assessing the Methodological Quality of Systematic Reviews (Online)  
13 Available at: [http://amstar.ca/Amstar\\_Checklist.php](http://amstar.ca/Amstar_Checklist.php) Accessed August 2019.  
14  
15  
16  
17  
18  
19  
20  
21  
22  
23  
24  
25  
26  
27  
28  
29  
30  
31  
32  
33  
34  
35  
36  
37  
38  
39  
40  
41  
42  
43  
44  
45  
46  
47  
48  
49  
50  
51  
52  
53  
54  
55  
56  
57  
58  
59  
60

## Appendix

Search strategy from PubMed search string:

defensive medicine OR defensive practice OR defensive practices OR medicine, defensive

("defensive medicine"[MeSH Terms] OR ("defensive"[All Fields] AND "medicine"[All Fields]) OR "defensive medicine"[All Fields]) OR ("defensive medicine"[MeSH Terms] OR ("defensive"[All Fields] AND "medicine"[All Fields]) OR "defensive medicine"[All Fields] OR ("defensive"[All Fields] AND "practice"[All Fields]) OR "defensive practice"[All Fields]) OR ("defensive medicine"[MeSH Terms] OR ("defensive"[All Fields] AND "medicine"[All Fields]) OR "defensive medicine"[All Fields] OR ("defensive"[All Fields] AND "practices"[All Fields]) OR "defensive practices"[All Fields]) OR ("defensive medicine"[MeSH Terms] OR ("defensive"[All Fields] AND "medicine"[All Fields]) OR "defensive medicine"[All Fields] OR "defensive medicine"[All Fields] OR ("defensive"[All Fields] AND "practices"[All Fields]) OR "defensive practices"[All Fields]) OR ("defensive medicine"[MeSH Terms] OR ("defensive"[All Fields] AND "medicine"[All Fields]) OR "defensive medicine"[All Fields] OR ("medicine"[All Fields] AND "defensive"[All Fields]))

## PRISMA-P 2015 Checklist

This checklist has been adapted for use with protocol submissions to *Systematic Reviews* from Table 3 in Moher D et al: Preferred reporting items for systematic review and meta-analysis protocols (PRISMA-P) 2015 statement. *Systematic Reviews* 2015 4:1

| Section/topic                     | #  | Checklist item                                                                                                                                                                                  | Information reported |    | Line number(s) |
|-----------------------------------|----|-------------------------------------------------------------------------------------------------------------------------------------------------------------------------------------------------|----------------------|----|----------------|
|                                   |    |                                                                                                                                                                                                 | Yes                  | No |                |
| <b>ADMINISTRATIVE INFORMATION</b> |    |                                                                                                                                                                                                 |                      |    |                |
| <b>Title</b>                      |    |                                                                                                                                                                                                 |                      |    |                |
| Identification                    | 1a | Identify the report as a protocol of a systematic review                                                                                                                                        | x                    |    | 1              |
| Update                            | 1b | If the protocol is for an update of a previous systematic review, identify as such                                                                                                              |                      | x  |                |
| <b>Registration</b>               | 2  | If registered, provide the name of the registry (e.g., PROSPERO) and registration number in the Abstract                                                                                        | x                    |    | 2              |
| <b>Authors</b>                    |    |                                                                                                                                                                                                 |                      |    |                |
| Contact                           | 3a | Provide name, institutional affiliation, and e-mail address of all protocol authors; provide physical mailing address of corresponding author                                                   | x                    |    | 2-3            |
| Contributions                     | 3b | Describe contributions of protocol authors and identify the guarantor of the review                                                                                                             | x                    |    | 3              |
| <b>Amendments</b>                 | 4  | If the protocol represents an amendment of a previously completed or published protocol, identify as such and list changes; otherwise, state plan for documenting important protocol amendments |                      | x  |                |
| <b>Support</b>                    |    |                                                                                                                                                                                                 |                      |    |                |
| Sources                           | 5a | Indicate sources of financial or other support for the review                                                                                                                                   | x                    |    | 3              |
| Sponsor                           | 5b | Provide name for the review funder and/or sponsor                                                                                                                                               | x                    |    | 11             |
| Role of sponsor/funder            | 5c | Describe roles of funder(s), sponsor(s), and/or institution(s), if any, in developing the protocol                                                                                              | x                    |    | 3              |
| <b>INTRODUCTION</b>               |    |                                                                                                                                                                                                 |                      |    |                |
| <b>Rationale</b>                  | 6  | Describe the rationale for the review in the context of what is already known                                                                                                                   | x                    |    | 6              |
| <b>Objectives</b>                 | 7  | Provide an explicit statement of the question(s) the review will address with reference to participants, interventions, comparators, and outcomes (PICO)                                        | x                    |    | 6              |
| <b>METHODS</b>                    |    |                                                                                                                                                                                                 |                      |    |                |

| Section/topic                             | #   | Checklist item                                                                                                                                                                                                                              | Information reported |    | Line number(s) |
|-------------------------------------------|-----|---------------------------------------------------------------------------------------------------------------------------------------------------------------------------------------------------------------------------------------------|----------------------|----|----------------|
|                                           |     |                                                                                                                                                                                                                                             | Yes                  | No |                |
| <b>Eligibility criteria</b>               | 8   | Specify the study characteristics (e.g., PICO, study design, setting, time frame) and report characteristics (e.g., years considered, language, publication status) to be used as criteria for eligibility for the review                   | x                    |    | 7              |
| <b>Information sources</b>                | 9   | Describe all intended information sources (e.g., electronic databases, contact with study authors, trial registers, or other grey literature sources) with planned dates of coverage                                                        | x                    |    | 7              |
| <b>Search strategy</b>                    | 10  | Present draft of search strategy to be used for at least one electronic database, including planned limits, such that it could be repeated                                                                                                  | x                    |    | 8              |
| <b>STUDY RECORDS</b>                      |     |                                                                                                                                                                                                                                             |                      |    |                |
| Data management                           | 11a | Describe the mechanism(s) that will be used to manage records and data throughout the review                                                                                                                                                | x                    |    | 8              |
| Selection process                         | 11b | State the process that will be used for selecting studies (e.g., two independent reviewers) through each phase of the review (i.e., screening, eligibility, and inclusion in meta-analysis)                                                 | x                    |    | 8              |
| Data collection process                   | 11c | Describe planned method of extracting data from reports (e.g., piloting forms, done independently, in duplicate), any processes for obtaining and confirming data from investigators                                                        | x                    |    | 9              |
| <b>Data items</b>                         | 12  | List and define all variables for which data will be sought (e.g., PICO items, funding sources), any pre-planned data assumptions and simplifications                                                                                       | x                    |    | 9              |
| <b>Outcomes and prioritization</b>        | 13  | List and define all outcomes for which data will be sought, including prioritization of main and additional outcomes, with rationale                                                                                                        | x                    |    | 10             |
| <b>Risk of bias in individual studies</b> | 14  | Describe anticipated methods for assessing risk of bias of individual studies, including whether this will be done at the outcome or study level, or both; state how this information will be used in data synthesis                        | x                    |    | 10-11          |
| <b>DATA</b>                               |     |                                                                                                                                                                                                                                             |                      |    |                |
| <b>Synthesis</b>                          | 15a | Describe criteria under which study data will be quantitatively synthesized                                                                                                                                                                 | x                    |    | 9-10           |
|                                           | 15b | If data are appropriate for quantitative synthesis, describe planned summary measures, methods of handling data, and methods of combining data from studies, including any planned exploration of consistency (e.g., $I^2$ , Kendall's tau) |                      | x  |                |
|                                           | 15c | Describe any proposed additional analyses (e.g., sensitivity or subgroup analyses, meta-regression)                                                                                                                                         |                      | x  |                |
|                                           | 15d | If quantitative synthesis is not appropriate, describe the type of summary planned                                                                                                                                                          | x                    |    | 9-10           |
| <b>Meta-bias(es)</b>                      | 16  | Specify any planned assessment of meta-bias(es) (e.g., publication bias across studies, selective reporting within studies)                                                                                                                 |                      | x  |                |
| <b>Confidence in cumulative evidence</b>  | 17  | Describe how the strength of the body of evidence will be assessed (e.g., GRADE)                                                                                                                                                            |                      | x  |                |

# BMJ Open

## How defensive medicine is defined and understood in European medical literature: Protocol for a systematic review

|                                 |                                                                                                                                                                                                                                                                                                                                                                                                                                                                                                                                                                                                                                                                                                                                                                                                                                                                                                                                                                                                                                                                                                |
|---------------------------------|------------------------------------------------------------------------------------------------------------------------------------------------------------------------------------------------------------------------------------------------------------------------------------------------------------------------------------------------------------------------------------------------------------------------------------------------------------------------------------------------------------------------------------------------------------------------------------------------------------------------------------------------------------------------------------------------------------------------------------------------------------------------------------------------------------------------------------------------------------------------------------------------------------------------------------------------------------------------------------------------------------------------------------------------------------------------------------------------|
| Journal:                        | <i>BMJ Open</i>                                                                                                                                                                                                                                                                                                                                                                                                                                                                                                                                                                                                                                                                                                                                                                                                                                                                                                                                                                                                                                                                                |
| Manuscript ID                   | bmjopen-2019-034300.R1                                                                                                                                                                                                                                                                                                                                                                                                                                                                                                                                                                                                                                                                                                                                                                                                                                                                                                                                                                                                                                                                         |
| Article Type:                   | Protocol                                                                                                                                                                                                                                                                                                                                                                                                                                                                                                                                                                                                                                                                                                                                                                                                                                                                                                                                                                                                                                                                                       |
| Date Submitted by the Author:   | 18-Dec-2019                                                                                                                                                                                                                                                                                                                                                                                                                                                                                                                                                                                                                                                                                                                                                                                                                                                                                                                                                                                                                                                                                    |
| Complete List of Authors:       | <p>Baungaard Pedersen, Nathalie; University of Southern Denmark Faculty of Health Sciences, Department of Public Health, Research Unit of General Practice.</p> <p>Skovvang Juul Jespersen, Pia; University of Southern Denmark Faculty of Health Sciences, Department of Public Health, Research Unit of General Practice.</p> <p>Assing Hvidt, Elisabeth; University of Southern Denmark Faculty of Health Sciences, Department of Public Health, Research Unit of General Practice.; University of Southern Denmark, Department for the Study of Culture</p> <p>Gerbild, Helle; Aalborg Universitet, Center for Sexology Research, Department of Clinical Medicine; University College Lillebaelt - Campus Odense, Health Sciences Research Centre University College</p> <p>Kirstine Andersen, Merethe; University of Southern Denmark Faculty of Health Sciences, Department of Public Health, Research Unit of General Practice</p> <p>Lykkegaard, Jesper; University of Southern Denmark Faculty of Health Sciences, Department of Public Health, Research Unit of General Practice</p> |
| <b>Primary Subject Heading</b>: | Qualitative research                                                                                                                                                                                                                                                                                                                                                                                                                                                                                                                                                                                                                                                                                                                                                                                                                                                                                                                                                                                                                                                                           |
| Secondary Subject Heading:      | Communication, Patient-centred medicine, Health economics                                                                                                                                                                                                                                                                                                                                                                                                                                                                                                                                                                                                                                                                                                                                                                                                                                                                                                                                                                                                                                      |
| Keywords:                       | Defensive medicine, Systematic review, Definition                                                                                                                                                                                                                                                                                                                                                                                                                                                                                                                                                                                                                                                                                                                                                                                                                                                                                                                                                                                                                                              |
|                                 |                                                                                                                                                                                                                                                                                                                                                                                                                                                                                                                                                                                                                                                                                                                                                                                                                                                                                                                                                                                                                                                                                                |

SCHOLARONE™  
Manuscripts



I, the Submitting Author has the right to grant and does grant on behalf of all authors of the Work (as defined in the below author licence), an exclusive licence and/or a non-exclusive licence for contributions from authors who are: i) UK Crown employees; ii) where BMJ has agreed a CC-BY licence shall apply, and/or iii) in accordance with the terms applicable for US Federal Government officers or employees acting as part of their official duties; on a worldwide, perpetual, irrevocable, royalty-free basis to BMJ Publishing Group Ltd ("BMJ") its licensees and where the relevant Journal is co-owned by BMJ to the co-owners of the Journal, to publish the Work in this journal and any other BMJ products and to exploit all rights, as set out in our [licence](#).

The Submitting Author accepts and understands that any supply made under these terms is made by BMJ to the Submitting Author unless you are acting as an employee on behalf of your employer or a postgraduate student of an affiliated institution which is paying any applicable article publishing charge ("APC") for Open Access articles. Where the Submitting Author wishes to make the Work available on an Open Access basis (and intends to pay the relevant APC), the terms of reuse of such Open Access shall be governed by a Creative Commons licence – details of these licences and which [Creative Commons](#) licence will apply to this Work are set out in our licence referred to above.

Other than as permitted in any relevant BMJ Author's Self Archiving Policies, I confirm this Work has not been accepted for publication elsewhere, is not being considered for publication elsewhere and does not duplicate material already published. I confirm all authors consent to publication of this Work and authorise the granting of this licence.

December 2019

1  
2  
3  
4  
5  
6  
7  
8  
9 Protocol for Systematic Review  
10  
11  
12  
13  
14

15 How defensive medicine is defined and understood in  
16 European medical literature: Protocol for a systematic  
17  
18 review  
19  
20  
21  
22  
23  
24  
25  
26  
27  
28  
29  
30  
31  
32  
33  
34  
35  
36  
37  
38  
39  
40  
41  
42  
43  
44  
45  
46  
47  
48  
49  
50  
51  
52  
53  
54  
55  
56  
57  
58  
59  
60

Authors:

Nathalie Baungaard Pedersen, NBP

Pia Skovvang Juul Jespersen, PSJJ

Elisabeth Assing Hvidt, EAH

Helle Gerbild, HG

Merethe Kirstine Andersen, MKA

Jesper Lykkegaard, JL

Word count: 2532



1 December 2019  
2  
3

4 ADMINISTRATIVE INFORMATION  
5  
6  
7

8  
9 **Title:**

10  
11 How defensive medicine is defined and understood in European medical literature: Protocol for a  
12 systematic review.  
13  
14

15  
16  
17  
18 **Registration:**

19  
20 This review will be registered in PROSPERO, International prospective register of systematic  
21 reviews.  
22  
23  
24

25  
26  
27 **Authors:**

28  
29 Nathalie Baungaard Pedersen<sup>a</sup>, Pia Skovvang Juul Jespersen<sup>a</sup>, Elisabeth Assing Hvidt<sup>ab</sup>, Helle  
30 Gerbild<sup>cd</sup>, Merethe Kirstine Andersen<sup>a</sup>, Jesper Lykkegaard<sup>a</sup>.  
31  
32  
33

34  
35  
36 <sup>a</sup> Research Unit of General Practice, Department of Public Health, University of Southern Denmark,  
37 5000 Odense C, Denmark.  
38

39  
40 <sup>b</sup> Department for the Study of Culture, University of Southern Denmark, 5230 Odense M, Denmark  
41

42  
43 <sup>c</sup> Center for Sexology Research, Department of Clinical Medicine, Aalborg University, Aalborg,  
44 Denmark.  
45

46  
47 <sup>d</sup> Health Sciences Research Centre University College, Odense, Denmark.  
48

49  
50  
51  
52 E-mail: nathaliebaungaard@gmail.com, piasjj@hotmail.com, ehvidt@health.sdu.dk, heng@ucl.dk,  
53 mkandersen@health.sdu.dk, jlykkegaard@health.sdu.dk  
54  
55  
56  
57  
58  
59  
60

December 2019

\*Corresponding author: Nathalie Baungaard Pedersen, Research Unit of General Practice, Department of Public Health, University of Southern Denmark, J. B. Winsløvs Vej 9A, 5000 Odense C, Denmark, Ph.: +45 28 30 72 95; e-mail: nathaliebaungaard@gmail.com

### Authors' contributions

|      |                                                                                                                                                                                                     |
|------|-----------------------------------------------------------------------------------------------------------------------------------------------------------------------------------------------------|
| NBP  | Conceptualisation, protocol design, development of search strategy, study inclusion, data extraction, quality assessment, data analysis/synthesis, drafting and writing of protocol and manuscript. |
| PSJJ | Conceptualisation, development of search strategy, study inclusion, data extraction, quality assessment, data analysis/synthesis, drafting and writing of manuscript.                               |
| EAH  | Conceptualisation, protocol design, writing of protocol and manuscript.                                                                                                                             |
| HG   | Conceptualisation, protocol design, writing of manuscript.                                                                                                                                          |
| MKA  | Conceptualisation, protocol design, writing of manuscript.                                                                                                                                          |
| JL   | Conceptualisation, protocol design, study inclusion, writing of protocol and manuscript.                                                                                                            |

### Financial support

NBP was supported by “General practitioners’ education- and development fund” (Praktiserende Lægers Uddannelses- og Udviklingsfond) with 27.810,00 DKK. EAH, HG, MKA and JL were financed through their institutions. PSJJ was non-financed. The funders had no role in developing the protocol.

### ABSTRACT

December 2019

1  
2  
3  
4 **Introduction:** The term defensive medicine, referring to actions motivated primarily by litigious  
5 concerns, originates from the United States and has been used in medical research literature since the  
6  
7 late 1960s. Differences in medical legal systems between the US and most European countries with  
8  
9 no tort legislation raise the question whether the US definition of defensive medicine holds true in  
10  
11 Europe.  
12  
13  
14

15 **Aim:** To present the protocol of a systematic review investigating variations in definitions and  
16 understandings of the term “defensive medicine” in European research articles.  
17  
18

19 **Methods and Analysis:** In concordance with the PRISMA guidelines, a systematic review of all  
20 medical research literature that investigate defensive medicine will be performed by two independent  
21 reviewers. The databases PubMed, Embase and Cochrane will be systematically searched on the basis  
22 of predetermined criteria. Data from all included European studies will systematically be extracted  
23 including the studies’ definitions and understandings of defensive medicine, especially the motives  
24 for doing medical actions that the study regards as “defensive”.  
25  
26  
27  
28  
29  
30  
31  
32  
33

34 **Ethics and Dissemination:** No ethics clearance is required as no primary data will be collected. The  
35 results of the systematic review will be published in a peer-reviewed, international journal.  
36  
37  
38  
39  
40

#### 41 **Strengths and limitations of this study**

##### 42 **Strengths:**

- 43  
44  
45 • The present systematic review will be based on a systematic and thorough search of literature  
46 independently performed by two reviewers concordant with the PRISMA guidelines, hereby  
47 increasing the generalisability and reliability of the findings.
- 48  
49  
50 • The scientific quality of each reviewed study will be assessed by use of standardised quality  
51 assessment tools and only the content of peer-reviewed original research papers will be  
52 included in the analysis.  
53  
54  
55  
56  
57  
58  
59  
60

1  
2  
3  
4  
5  
6  
7  
8  
9  
10  
11  
12  
13  
14  
15  
16  
17  
18  
19  
20  
21  
22  
23  
24  
25  
26  
27  
28  
29  
30  
31  
32  
33  
34  
35  
36  
37  
38  
39  
40  
41  
42  
43  
44  
45  
46  
47  
48  
49  
50  
51  
52  
53  
54  
55  
56  
57  
58  
59  
60

December 2019

#### **Limitations:**

- Only English language studies will be included in the systematic review.

## INTRODUCTION

### **Background**

Defensive medicine (DM) is a term that has been used in the medical research literature since the late 1960s (1). The term originates from the US (2) and has since then taken on various connotations (3). The most commonly used definition describes DM as “physicians’ deviations from sound medical practice due to fear of liability claims and lawsuits” (4-8). DM can additionally be subdivided into two main forms of behaviour: 1. positive DM (also labelled active DM or assurance behaviour), which involves physicians ordering extra diagnostic tests, procedures or visits and 2. negative DM (also labelled passive DM or avoidance behaviour) which is the avoidance of high-risk patients or procedures. Both forms aim to reduce physicians’ exposure to malpractice liability (4-7). The above definition of DM consists of two components: A medical action and an underlying motive for acting defensively.

DM has been associated with rising health care costs (7). Furthermore, it has been associated with overtreatment, -prescription and -diagnosing of patients and decreased trust in the physician-patient relationship, leading patients to mistrust physicians’ motivations and physicians to regard patients as potential plaintiffs (7, 9-12). Moreover, physicians report patient disrespect for their professionalism, personal frustration, and inequality in healthcare as possible consequences of defensive medicine (13, 14).

In the US, DM is reported to be frequent (15). The number of lawsuits for medical malpractice has risen significantly (9), and DM has been shown to be directly related to this growth (12). US physicians are forced to hold expensive malpractice insurances in order to cover the cost from

December 2019

1  
2  
3  
4 malpractice suits (16). Hence, with inadequate legislation protecting physicians from tort, concerns  
5  
6 about malpractice liability is likely to be the predominant reason to act defensively (7). Indeed,  
7  
8 negative associations have been found between physicians' use of medical resources and risk of  
9  
10 malpractice claims (17).  
11  
12

13  
14 In several European countries malpractice litigation is reported to happen less frequently than in  
15  
16 the US, e.g. in the Netherlands (2, 18) Denmark (13), Switzerland (19), and the UK (20). In these  
17  
18 countries, the medico-legal system does not hold physicians financially liable for malpractice or other  
19  
20 treatment related adverse events. The patients are instead compensated by the government (known as  
21  
22 a no-fault system) (21-23). Nevertheless, DM seems also to be prevalent in Europe, e.g. Denmark  
23  
24 (13), the UK (24), Italy (12), Belgium (25), The Netherlands (2), Germany (26) and Switzerland (20).  
25  
26 Furthermore, a substantial part of research on DM seems to originate from Europe.  
27  
28

29  
30 Variations in medico-legal systems between the US and most European countries raise the question  
31  
32 whether the definition of DM, as actions motivated primarily by litigious concerns, holds true in  
33  
34 European countries where physicians are not subjected to tort legislation (20) and if other motives for  
35  
36 performing defensive medical actions are documented in the European literature on DM (27).  
37  
38  
39

#### 40 41 **Rationale**

42  
43 Science needs definitions. To our knowledge no systematic review exists of how DM is defined and  
44  
45 understood in the European scientific, medical literature. A systematic review of the term “defensive  
46  
47 medicine” in the European context will provide a more nuanced understanding of this complex and  
48  
49 non-beneficial phenomenon, hereby supporting the quality of future research on the topic.  
50  
51  
52

#### 53 54 **Objectives**

55  
56  
57  
58  
59  
60

1  
2  
3  
4  
5  
6  
7  
8  
9  
10  
11  
12  
13  
14  
15  
16  
17  
18  
19  
20  
21  
22  
23  
24  
25  
26  
27  
28  
29  
30  
31  
32  
33  
34  
35  
36  
37  
38  
39  
40  
41  
42  
43  
44  
45  
46  
47  
48  
49  
50  
51  
52  
53  
54  
55  
56  
57  
58  
59  
60

December 2019

The aim of this study is to present a protocol paper for a systematic review with the following objective: To analyse variations in the definitions and understandings of the term “defensive medicine” in European research articles.

## METHODS

### **Patient and Public Involvement**

Patients or the public were not involved in the design, or conduct, or reporting, or dissemination of our research.

### **Protocol**

This protocol for a systematic review is conducted in concordance with the PRISMA-P (Preferred Reporting Items for Systematic Reviews – Protocol) (28).

### **Eligibility criteria**

Publications will be included in the review based on the following criteria:

#### *Inclusion criteria:*

1. One or both of the terms “defensive medicine” and “defensive practice” are stated in title or abstract.
2. The study is available in full-text and written in English language.
3. DM is performed by physicians, including general practitioners, as well as physicians from medical, surgical and paraclinical specialities.
4. The study is an original research study (quantitative or qualitative primary research) or systematic review published in a peer-reviewed, medical journal.

December 2019

5. DM is stated as part of the study's aim/objective in at least one of the following ways:
  - a. DM is included in the publication's aim/objective.
  - b. DM is implicitly a significant part of the aim/objective.

Further

6. The study's research data includes data from Europe.

### Information sources

Eligible studies will be searched in three databases: PubMed, Embase and Cochrane, 3<sup>rd</sup> of February 2020.

### Search strategy

The preparation of search strategy is based on the original American term "defensive medicine". In accordance with the database PubMed, the MeSH term "defensive medicine" is combined with the entry terms "defensive practice", "defensive practices" and "medicine, defensive". On the basis of this, the following search strategy will be used: "defensive medicine OR defensive practice OR defensive practices OR medicine, defensive". All references in the papers fulfilling the inclusion criteria will be examined in order to identify potentially neglected studies. The literature search will be updated before the final analysis. See appendix for detailed search strategy.

### Study records

#### *Data management*

Publications found by the search strategy will be exported into the reference management software (EndNote) (29) and the software Covidence (30), where the systematic screening and data extraction

December 2019

1  
2  
3  
4 will be performed, including the removing of duplicates. Number of citations for each study will be  
5  
6 assessed with Web of Science (31) in concordance with the PRISMA guidelines (28).  
7  
8  
9

### 10 11 *Selection process*

12  
13 Two independent reviewers (NBP and PSJJ) will screen all potentially relevant studies in a two-phase  
14  
15 screening process to ensure interrater reliability, compliance with the inclusion criteria and eligibility  
16  
17 by use of Covidence (30). NBA and PSJJ will discuss and resolve any disagreements to reach  
18  
19 consensus. If consensus is not achievable, a third reviewer (JL) will be involved in the discussion and  
20  
21 finally decide whether the study in question is to be included or not.  
22  
23  
24  
25

### 26 27 *Data collection process*

28  
29 The primary authors (NBP and PSJJ) will extract data from the included studies, including publication  
30  
31 details (author(s), name of journal, year of publication), study characteristics (design, country of  
32  
33 origin, sample size, medical speciality investigated, and number of citations), study objective, stated  
34  
35 definitions of DM and understandings of DM.  
36  
37  
38  
39  
40

### 41 **Quality assessment**

42  
43 The two reviewers (NBP and PSJJ) will independently assess the quality of each study. The  
44  
45 qualitative studies will be reviewed using the Critical Appraisal Skills Programme (CASP) (32),  
46  
47 recommended by the Centre for Clinical Guidelines (CFKR) (33), to ensure a critical and  
48  
49 standardized assessment of the quality and analysis of the study. The quantitative studies will be  
50  
51 reviewed using a cross-sectional appraisal tool with questions adapted from Guyatt GH et al. JAMA  
52  
53 1993 and 1994 (34, 35). The systematic reviews will be reviewed using Assessing the Methodological  
54  
55  
56  
57  
58  
59  
60



1 December 2019

2  
3  
4 Quality of Systematic Reviews (AMSTAR) (36) recommended by the Centre for Clinical Guidelines  
5  
6 (CFKR) (33). Disagreements will be discussed until consensus is reached.  
7  
8  
9

### 10 11 **Data items**

12  
13 Data items are as stated above under “methods”. The design of the review is based on the hypothesis  
14  
15 that a definition of DM reflects the medico-legal system in which it is used. Therefore, we expect the  
16  
17 definitions and understandings of DM stated in the European research literature to be different than  
18  
19 those stated in the literature deriving from the US.  
20  
21  
22  
23  
24

### 25 **Data synthesis**

26  
27 For each paper, the stated definition and understanding of DM will be extracted by the first author  
28  
29 (NBP). The definition of DM will be identified as: “DM is...”, “DM is defined as...”, “DM refers  
30  
31 to...”, or “DM is characterized by...”. If no definition of DM is stated, the way in which DM is  
32  
33 introduced will be identified. A paper’s understanding of DM is assessed from its use in the study  
34  
35 and may differ from the stated definition. Quotes identifying how DM is understood will be extracted  
36  
37 and analysed according to a thematic analysis approach aiming to categorize the different  
38  
39 understandings. Based on the above definitions of DM, it is expected that the vast majority of papers  
40  
41 will define DM as healthcare actions conducted by healthcare professionals during their work, but  
42  
43 that the motives making the actions defensive may differ between papers showing a broader  
44  
45 understanding of DM in some European studies than according to the US definition. Thus, for each  
46  
47 paper, the motives regarded as defensive will be identified in the texts, tables, figures, as well as in  
48  
49 the data collection methods. The identified categories of DM definitions and understandings will be  
50  
51 scrutinized by the author group.  
52  
53  
54  
55  
56  
57  
58  
59  
60

December 2019

## **Outcomes and prioritization**

The review's main outcomes will be a categorisation of the identified definitions of DM in the European medical research literature focusing on the motives for medical acting that the studies regard as defensive and a graphical display of the historical trend in the annual number of published European original research papers regarding DM divided on the identified categories of DM definitions. The review will report if any differences in the definitions and understandings of DM between countries and between high- and low-quality papers exist.

## **Risk of bias in individual studies**

Since the objective of this study differs from most systematic reviews by not taking interest in the results found by the reviewed studies, the quality assessment of the identified papers serves a different purpose. The assessment of the quality of the papers is used to show whether high quality papers use a different definition of DM than other papers (see the above described quality assessment procedure). Although there are multiple languages used in Europe, the review only includes English scientific literature. However, most high-ranking scientific journals reporting on DM is written in English and we specifically aim to support future research on DM. Furthermore, DM was originally conceptualized in English.

## **Conclusion**

This systematic review will address the variations in the definitions and understandings of the term "defensive medicine" in European research articles. This review seeks to provide a more nuanced understanding of the complex and non-beneficial phenomenon of defensive medicine, hereby supporting the quality of future research on the topic.

1 December 2019  
2  
3

4 **Potential amendments**  
5

6 We do not envisage any amendments to the present protocol. However, should an amendment be  
7 necessary, it will be notified, registered and reported.  
8  
9  
10  
11  
12

13 **Funding**  
14

15 This work was supported by “General practitioners’ education- and development fund”  
16 (Praktiserende Lægers Uddannelses- og Udviklingsfond) grant number 27.810,00 DKK.  
17  
18  
19  
20  
21  
22

23 **Exclusive licence**  
24

25 I (NBP), the Submitting Author has the right to grant and does grant on behalf of all authors of the  
26 Work (as defined in the below author licence) an exclusive licence and/or a non-exclusive licence for  
27 contributions from authors who are: i) UK Crown employees; ii) where BMJ has agreed a CC-BY  
28 licence shall apply, and/or iii) in accordance with the terms applicable for US Federal Government  
29 officers or employees acting as part of their official duties; on a worldwide, perpetual, irrevocable,  
30 royalty-free basis to BMJ Publishing Group Ltd (“BMJ”) its licensees and where the relevant Journal  
31 is co-owned by BMJ to the co-owners of the Journal, to publish the Work in BMJ Open and any other  
32 BMJ products and to exploit all rights, as set out in our licence.  
33  
34  
35  
36  
37  
38  
39  
40  
41  
42  
43  
44  
45

46 The Submitting Author accepts and understands that any supply made under these terms is made by  
47 BMJ to the Submitting Author unless you are acting as an employee on behalf of your employer or a  
48 postgraduate student of an affiliated institution which is paying any applicable article publishing  
49 charge (“APC”) for Open Access articles. Where the Submitting Author wishes to make the Work  
50 available on an Open Access basis (and intends to pay the relevant APC), the terms of reuse of such  
51  
52  
53  
54  
55  
56  
57  
58  
59  
60

1  
2  
3  
4  
5  
6  
7  
8  
9  
10  
11  
12  
13  
14  
15  
16  
17  
18  
19  
20  
21  
22  
23  
24  
25  
26  
27  
28  
29  
30  
31  
32  
33  
34  
35  
36  
37  
38  
39  
40  
41  
42  
43  
44  
45  
46  
47  
48  
49  
50  
51  
52  
53  
54  
55  
56  
57  
58  
59  
60

December 2019

Open Access shall be governed by a Creative Commons licence – details of these licences and which Creative Commons licence will apply to this Work are set out in our licence referred to above.

### **Acknowledgements**

Research librarian, Lasse Østengaard, University of Southern Denmark for advice on the search strategy.

### **Conflict of interests**

The authors declare that they have no competing interests.

December 2019

## References

1. Guthorn PJ. Toward a defensive stance in medical practice. *The Journal of the Medical Society of New Jersey*. 1968;65(10):548-9.
2. Veldhuis M. Defensive behavior of Dutch family physicians. Widening the concept. *Family medicine*. 1994;26(1):27-9.
3. Jones WA, Johnson JA, Williams SP. Controlling defensive medical practices and costs through state health policy reform. *Journal of health and human services administration*. 1996;19(2):163-81.
4. Studdert DM, Mello MM, Sage WM, DesRoches CM, Peugh J, Zapert K, et al. Defensive medicine among high-risk specialist physicians in a volatile malpractice environment. *Jama*. 2005;293(21):2609-17.
5. Corrigan J, Wagner J, Wolfe L, Klingman D, Polishuk P. Medical malpractice reform and defensive medicine. *Cancer investigation*. 1996;14(3):277-84.
6. OTA. Office of Technology Assessment. Defensive medicine and medical malpractice. Washington (DC). (Online) Available from: <http://ota.fas.org/reports/9405.pdf>. 1994 (Publication No. OTA-H-602). Accessed July 2019.
7. Panella M, Rinaldi C, Leigheb F, Knesse S, Donnarumma C, Kul S, et al. Prevalence and costs of defensive medicine: A national survey of Italian physicians. *Journal of Health Services Research and Policy*. 2017;22(4):211-7.
8. Hershey N. The defensive practice of medicine. Myth or reality. *The Milbank Memorial Fund quarterly*. 1972;50(1):69-98.
9. Garcia-Retamero R, Galesic M. On defensive decision making: how doctors make decisions for their patients. *Health expectations : an international journal of public participation in health care and health policy*. 2014;17(5):664-9.
10. Brateanu A, Schramm S, Hu B, Boyer K, Nottingham K, Taksler GB, et al. Quantifying the defensive medicine contribution to primary care costs. *Journal of medical economics*. 2014;17(11):810-6.
11. Bourne T, Wynants L, Peters M, Van Audenhove C, Timmerman D, Van Calster B, et al. The impact of complaints procedures on the welfare, health and clinical practise of 7926 doctors in the UK: a cross-sectional survey. *BMJ open*. 2015;5(1):e006687.
12. Catino M, Celotti S. The problem of defensive medicine: two Italian surveys. *Studies in health technology and informatics*. 2009;148:206-21.
13. Assing Hvidt E, Lykkegaard J, Pedersen LB, Pedersen KM, Munck A, Andersen MK. How is defensive medicine understood and experienced in a primary care setting? A qualitative focus group study among Danish general practitioners. *BMJ open*. 2017;7(12):e019851.
14. Assing Hvidt E, Bjørnskov Pedersen L, Lykkegaard J, Møller Pedersen K, Andersen MK. A colonized general practice? A critical habermasian analysis of how general practitioners experience defensive medicine in their everyday working life. *Health (London)*. 2019;1363459319857461.
15. Hooe BS, Thakore RV, Issar N, Sathiyakumar V, Obremsky WT, Sethi MK. Do practice settings influence defensive medicine in orthopedic surgery? *American journal of orthopedics (Belle Mead, NJ)*. 2014;43(8):E175-80.
16. Investopedia. (Online) Available at: <https://www.investopedia.com/terms/m/malpractice-insurance.asp>. Accessed 6th August 2018.

December 2019

17. Jena AB, Schoemaker L, Bhattacharya J, Seabury SA. Physician spending and subsequent risk of malpractice claims: observational study. *BMJ (Clinical research ed)*. 2015;351:h5516.
18. Van Boven K, Dijksterhuis P, Lamberts H. Defensive testing in Dutch family practice. Is the grass greener on the other side of the ocean? *The Journal of family practice*. 1997;44(5):468-72.
19. Rohacek M, Buatsi J, Szucs-Farkas Z, Kleim B, Zimmermann H, Exadaktylos A, et al. Ordering CT pulmonary angiography to exclude pulmonary embolism: defense versus evidence in the emergency room. *Intensive care medicine*. 2012;38(8):1345-51.
20. Steurer J, Held U, Schmidt M, Gigerenzer G, Tag B, Bachmann LM. Legal concerns trigger prostate-specific antigen testing. *Journal of evaluation in clinical practice*. 2009;15(2):390-2.
21. Antoci A, Fiori Maccioni A, Russu P. The Ecology of Defensive Medicine and Malpractice Litigation. *PloS one*. 2016;11(3):e0150523.
22. Yan SC, Hulsbergen AFC, Muskens IS, van Dam M, Gormley WB, Broekman MLD, et al. Defensive medicine among neurosurgeons in the Netherlands: a national survey. *Acta neurochirurgica*. 2017;159(12):2341-50.
23. Kessler DP, Summerton N, Graham JR. Effects of the medical liability system in Australia, the UK, and the USA. *Lancet (London, England)*. 2006;368(9531):240-6.
24. Summerton N. Trends in negative defensive medicine within general practice. *The British journal of general practice : the journal of the Royal College of General Practitioners*. 2000;50(456):565-6.
25. Vandersteegen T, Marneffe W, Cleemput I, Vandijck D, Vereeck L. The determinants of defensive medicine practices in Belgium. *Health economics, policy, and law*. 2017;12(3):363-86.
26. Brilla R, Evers S, Deutschlander A, Wartenberg KE. Are neurology residents in the United States being taught defensive medicine? *Clinical neurology and neurosurgery*. 2006;108(4):374-7.
27. Ramella S, Mandoliti G, Trodella L, D'Angelillo RM. The first survey on defensive medicine in radiation oncology. *La Radiologia medica*. 2015;120(5):421-9.
28. Shamseer L MD, Clarke M, Gherzi D, Liberati A, Petticrew M, Shekelle P, Stewart LA; PRISMA-P Group. Preferred reporting items for systematic review and meta-analysis protocols (PRISMA-P) 2015: elaboration and explanation. *BMJ (Clinical research ed)*. 2015;350:g7647.
29. EndNote. (Online) Available at: <https://endnote.com>. Accessed July 2019.
30. Covidence. (Online) Available at: <https://www.covidence.org/reviews>. Accessed July 2019.
31. WebOfScience. (Online) Available at [www.webofknowledge.com/](http://www.webofknowledge.com/).
32. CASP. Critical Appraisal Skills Programme (2018). CASP (Qualitative) Checklist. (Online) Available at: <https://casp-uk.net/wp-content/uploads/2018/01/CASP-Qualitative-Checklist-2018.pdf>. Accessed July 2019.
33. CFKR. Center for kliniske retningslinjer. CASP tool. (Online) Available at: <http://www.cfkr.dk/manualer-og-skabeloner/casp-instrumentet.aspx>. Accessed July 2019.
34. Guyatt GH SD, Cook DJ. Users' guides to the medical literature. II. How to use an article about therapy or prevention. A. Are the results of the study valid? Evidence-Based Medicine Working Group. *Jama*. 1993;270(21):2598-601.

December 2019

- 1
- 2
- 3
- 4
- 5 35. Guyatt GH SD, Cook DJ. Users' guides to the medical literature. II. How to use an
- 6 article about therapy or prevention. B. What were the results and will they help me in caring for
- 7 my patients? Evidence-Based Medicine Working Group. *Jama*. 1994;271(1):59-63.
- 8 36. AMSTAR. Assessing the Methodological Quality of Systematic Reviews (Online)
- 9 Available at: [http://amstar.ca/Amstar\\_Checklist.php](http://amstar.ca/Amstar_Checklist.php) Accessed August 2019.
- 10
- 11
- 12
- 13
- 14
- 15
- 16
- 17
- 18
- 19
- 20
- 21
- 22
- 23
- 24
- 25
- 26
- 27
- 28
- 29
- 30
- 31
- 32
- 33
- 34
- 35
- 36
- 37
- 38
- 39
- 40
- 41
- 42
- 43
- 44
- 45
- 46
- 47
- 48
- 49
- 50
- 51
- 52
- 53
- 54
- 55
- 56
- 57
- 58
- 59
- 60

For peer review only

## Appendix

Search strategy from PubMed search string:

defensive medicine OR defensive practice OR defensive practices OR medicine, defensive

("defensive medicine"[MeSH Terms] OR ("defensive"[All Fields] AND "medicine"[All Fields]) OR "defensive medicine"[All Fields]) OR ("defensive medicine"[MeSH Terms] OR ("defensive"[All Fields] AND "medicine"[All Fields]) OR "defensive medicine"[All Fields] OR ("defensive"[All Fields] AND "practice"[All Fields]) OR "defensive practice"[All Fields]) OR ("defensive medicine"[MeSH Terms] OR ("defensive"[All Fields] AND "medicine"[All Fields]) OR "defensive medicine"[All Fields] OR ("defensive"[All Fields] AND "practices"[All Fields]) OR "defensive practices"[All Fields]) OR ("defensive medicine"[MeSH Terms] OR ("defensive"[All Fields] AND "medicine"[All Fields]) OR "defensive medicine"[All Fields] OR ("defensive medicine"[All Fields] OR ("medicine"[All Fields] AND "defensive"[All Fields]))



## PRISMA-P 2015 Checklist

This checklist has been adapted for use with protocol submissions to *Systematic Reviews* from Table 3 in Moher D et al: Preferred reporting items for systematic review and meta-analysis protocols (PRISMA-P) 2015 statement. *Systematic Reviews* 2015 4:1

| Section/topic                     | #  | Checklist item                                                                                                                                                                                  | Information reported |    | Line number(s) |
|-----------------------------------|----|-------------------------------------------------------------------------------------------------------------------------------------------------------------------------------------------------|----------------------|----|----------------|
|                                   |    |                                                                                                                                                                                                 | Yes                  | No |                |
| <b>ADMINISTRATIVE INFORMATION</b> |    |                                                                                                                                                                                                 |                      |    |                |
| <b>Title</b>                      |    |                                                                                                                                                                                                 |                      |    |                |
| Identification                    | 1a | Identify the report as a protocol of a systematic review                                                                                                                                        | x                    |    | 1              |
| Update                            | 1b | If the protocol is for an update of a previous systematic review, identify as such                                                                                                              |                      | x  |                |
| <b>Registration</b>               | 2  | If registered, provide the name of the registry (e.g., PROSPERO) and registration number in the Abstract                                                                                        | x                    |    | 2              |
| <b>Authors</b>                    |    |                                                                                                                                                                                                 |                      |    |                |
| Contact                           | 3a | Provide name, institutional affiliation, and e-mail address of all protocol authors; provide physical mailing address of corresponding author                                                   | x                    |    | 2-3            |
| Contributions                     | 3b | Describe contributions of protocol authors and identify the guarantor of the review                                                                                                             | x                    |    | 3              |
| <b>Amendments</b>                 | 4  | If the protocol represents an amendment of a previously completed or published protocol, identify as such and list changes; otherwise, state plan for documenting important protocol amendments |                      | x  |                |
| <b>Support</b>                    |    |                                                                                                                                                                                                 |                      |    |                |
| Sources                           | 5a | Indicate sources of financial or other support for the review                                                                                                                                   | x                    |    | 3              |
| Sponsor                           | 5b | Provide name for the review funder and/or sponsor                                                                                                                                               | x                    |    | 12             |
| Role of sponsor/funder            | 5c | Describe roles of funder(s), sponsor(s), and/or institution(s), if any, in developing the protocol                                                                                              | x                    |    | 3              |
| <b>INTRODUCTION</b>               |    |                                                                                                                                                                                                 |                      |    |                |
| <b>Rationale</b>                  | 6  | Describe the rationale for the review in the context of what is already known                                                                                                                   | x                    |    | 6              |
| <b>Objectives</b>                 | 7  | Provide an explicit statement of the question(s) the review will address with reference to participants, interventions, comparators, and outcomes (PICO)                                        | x                    |    | 6-7            |
| <b>METHODS</b>                    |    |                                                                                                                                                                                                 |                      |    |                |

| Section/topic                             | #   | Checklist item                                                                                                                                                                                                                              | Information reported |    | Line number(s) |
|-------------------------------------------|-----|---------------------------------------------------------------------------------------------------------------------------------------------------------------------------------------------------------------------------------------------|----------------------|----|----------------|
|                                           |     |                                                                                                                                                                                                                                             | Yes                  | No |                |
| <b>Eligibility criteria</b>               | 8   | Specify the study characteristics (e.g., PICO, study design, setting, time frame) and report characteristics (e.g., years considered, language, publication status) to be used as criteria for eligibility for the review                   | x                    |    | 7-8            |
| <b>Information sources</b>                | 9   | Describe all intended information sources (e.g., electronic databases, contact with study authors, trial registers, or other grey literature sources) with planned dates of coverage                                                        | x                    |    | 8              |
| <b>Search strategy</b>                    | 10  | Present draft of search strategy to be used for at least one electronic database, including planned limits, such that it could be repeated                                                                                                  | x                    |    | 8              |
| <b>STUDY RECORDS</b>                      |     |                                                                                                                                                                                                                                             |                      |    |                |
| Data management                           | 11a | Describe the mechanism(s) that will be used to manage records and data throughout the review                                                                                                                                                | x                    |    | 8-9            |
| Selection process                         | 11b | State the process that will be used for selecting studies (e.g., two independent reviewers) through each phase of the review (i.e., screening, eligibility, and inclusion in meta-analysis)                                                 | x                    |    | 9              |
| Data collection process                   | 11c | Describe planned method of extracting data from reports (e.g., piloting forms, done independently, in duplicate), any processes for obtaining and confirming data from investigators                                                        | x                    |    | 9              |
| <b>Data items</b>                         | 12  | List and define all variables for which data will be sought (e.g., PICO items, funding sources), any pre-planned data assumptions and simplifications                                                                                       | x                    |    | 10             |
| <b>Outcomes and prioritization</b>        | 13  | List and define all outcomes for which data will be sought, including prioritization of main and additional outcomes, with rationale                                                                                                        | x                    |    | 11             |
| <b>Risk of bias in individual studies</b> | 14  | Describe anticipated methods for assessing risk of bias of individual studies, including whether this will be done at the outcome or study level, or both; state how this information will be used in data synthesis                        | x                    |    | 11             |
| <b>DATA</b>                               |     |                                                                                                                                                                                                                                             |                      |    |                |
| <b>Synthesis</b>                          | 15a | Describe criteria under which study data will be quantitatively synthesized                                                                                                                                                                 | x                    |    | 10             |
|                                           | 15b | If data are appropriate for quantitative synthesis, describe planned summary measures, methods of handling data, and methods of combining data from studies, including any planned exploration of consistency (e.g., $I^2$ , Kendall's tau) |                      | x  |                |
|                                           | 15c | Describe any proposed additional analyses (e.g., sensitivity or subgroup analyses, meta-regression)                                                                                                                                         |                      | x  |                |
|                                           | 15d | If quantitative synthesis is not appropriate, describe the type of summary planned                                                                                                                                                          | x                    |    | 10             |
| <b>Meta-bias(es)</b>                      | 16  | Specify any planned assessment of meta-bias(es) (e.g., publication bias across studies, selective reporting within studies)                                                                                                                 |                      | x  |                |
| <b>Confidence in cumulative evidence</b>  | 17  | Describe how the strength of the body of evidence will be assessed (e.g., GRADE)                                                                                                                                                            |                      | x  |                |
