# Supplementary material for: How defensive medicine is defined and understood in European medical literature: protocol for a systematic review
Source: PubMed Central journal article supplement — BMJ Open. 2020 Feb 28;10(2):e034300. doi: 10.1136/bmjopen-2019-034300 (PMC7050374; doi:10.1136/bmjopen-2019-034300), 2020-02-28
Supplement: bmjopen-2019-034300supp001.pdf [file bmjopen-2019-034300supp001.pdf]

## Appendix

Search strategy from PubMed search string:

defensive medicine OR defensive practice OR defensive practices OR medicine, defensive

("defensive medicine"[MeSH Terms] OR ("defensive"[All Fields] AND "medicine"[All Fields]) OR "defensive medicine"[All Fields]) OR ("defensive medicine"[MeSH Terms] OR ("defensive"[All Fields] AND "medicine"[All Fields]) OR "defensive medicine"[All Fields] OR ("defensive"[All Fields] AND "practice"[All Fields]) OR "defensive practice"[All Fields]) OR ("defensive medicine"[MeSH Terms] OR ("defensive"[All Fields] AND "medicine"[All Fields]) OR "defensive medicine"[All Fields] OR ("defensive"[All Fields] AND "practices"[All Fields]) OR "defensive practices"[All Fields]) OR ("defensive medicine"[MeSH Terms] OR ("defensive"[All Fields] AND "medicine"[All Fields]) OR "defensive medicine"[All Fields] OR ("medicine"[All Fields] AND "defensive"[All Fields]))
